# Supplementary material
Source: PubMed Central journal article supplement (PMC283555)

10 kb

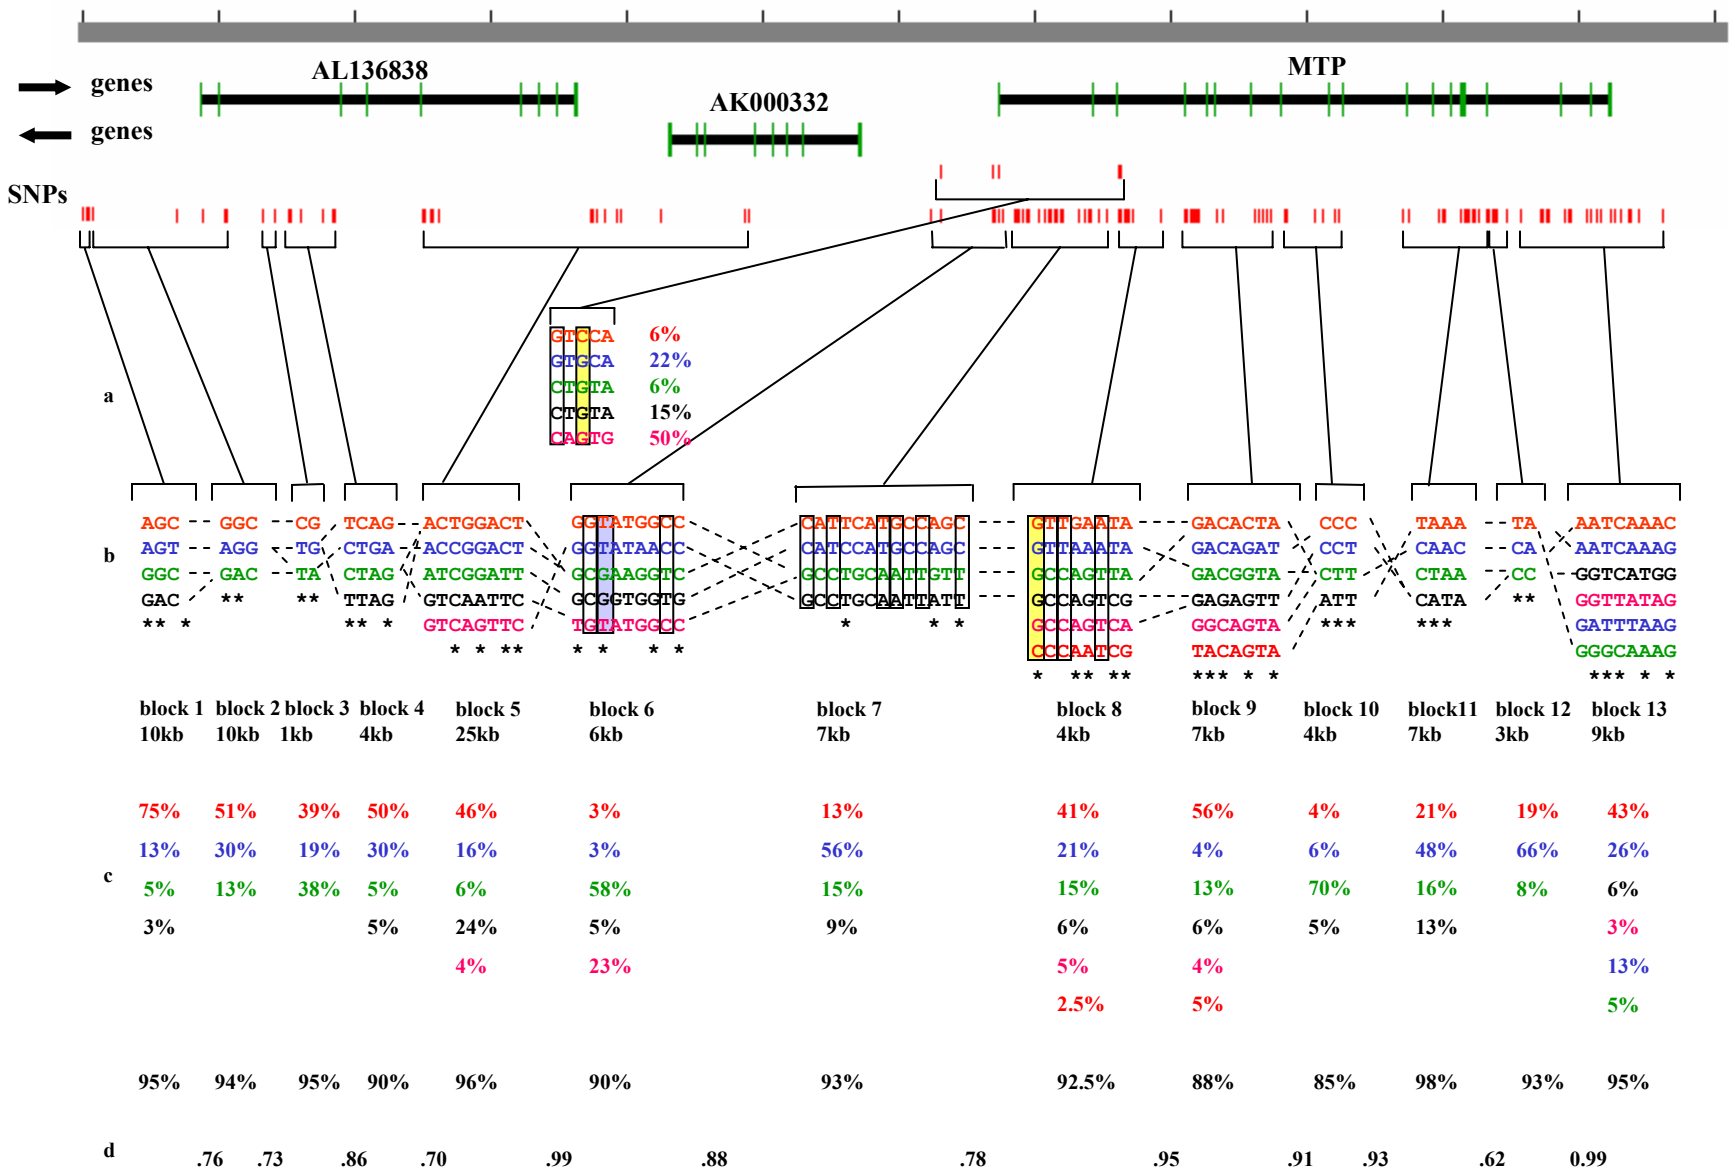

Supplement: pnas_100_24_14115__2.pdf [file pnas_100_24_14115__2.pdf]
